# Supplementary material for: Multi-component assembly and luminescence tuning of lanthanide hybrids through the inside–outside double modification of zeolite A/L
Source: Royal Society of Chemistry journal article supplement (doi:10.1039/c5nj00021a), 2015-01-01
Supplement: c5nj00021a1.pdf [file c5nj00021a1.pdf]

## Supporting information

### Multi-component assembly and luminescence tuning of lanthanide hybrids through the inside-outside double modification of zeolite A/L

Lei Chen, Bing Yan\*

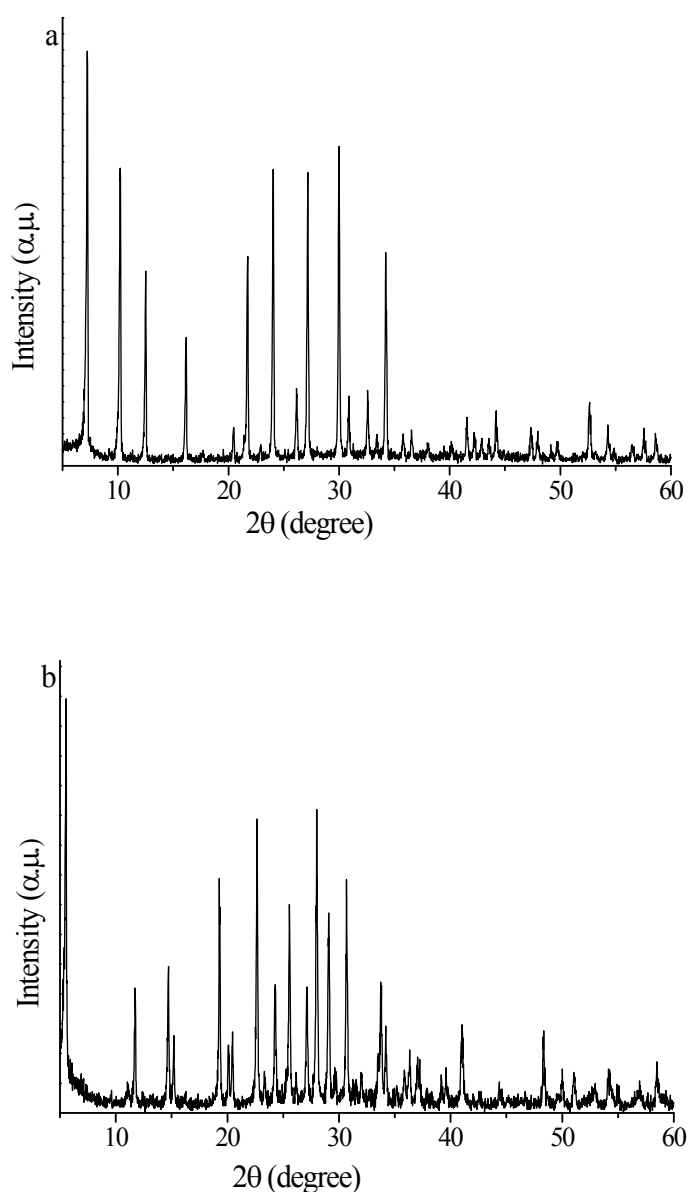

**Figure S1** XRD patterns of zeolite A (a) and zeolite L (b) from 5-60 ° in a  $2\theta$  range

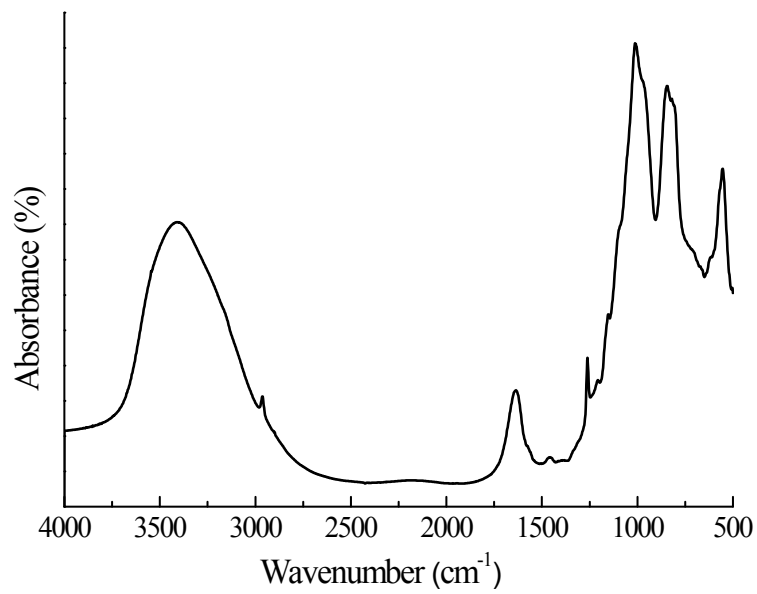

**Figure S2** The selected FTIR spectrum of SmW10-IM-[ZA⊃Eu-TTA]

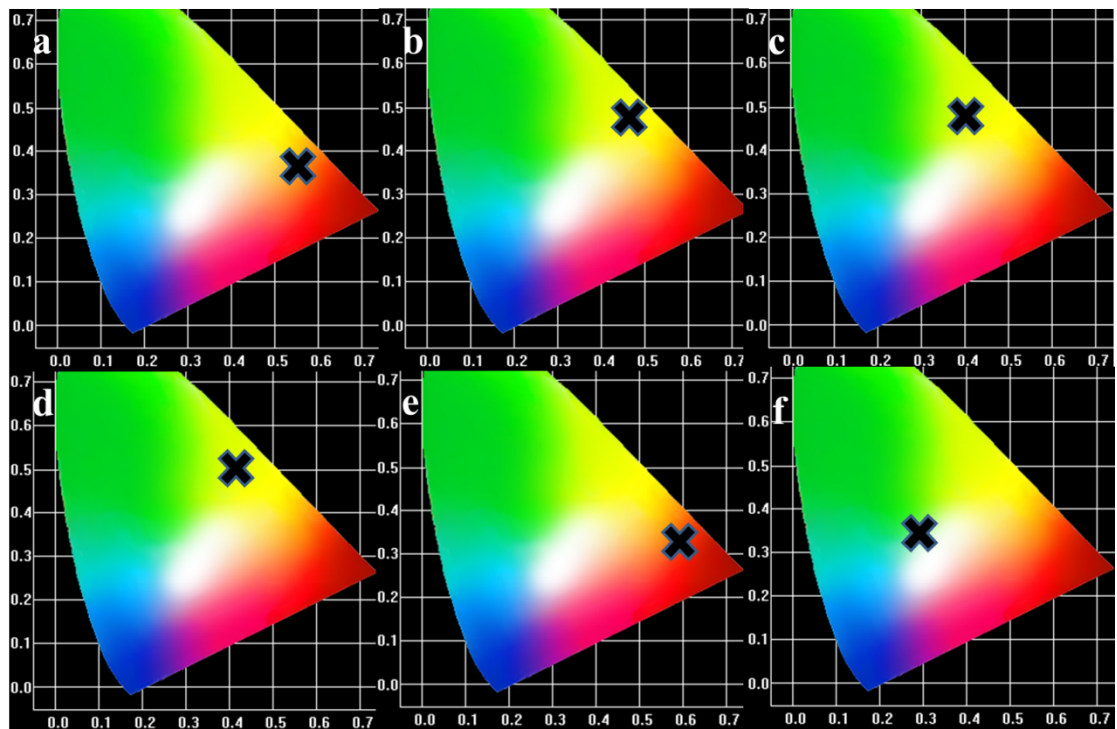

**Figure S3** The selected CIE diagrams of EuW10-IM-[ZA⊃Tb-TAA] (a), EuW10-IM-[ZL⊃Tb-TAA] (b), TbW10-IM-[ZA⊃Eu-TTA] (c), TbW10-IM-[ZL⊃Eu-TTA] (d), SmW10-IM-[ZA⊃Eu-TTA] (e) and DyW10-IM-[ZA⊃Tb-TAA] (f)
